# Supplementary material for: Effect off-element complexation on the radiolysis of 2-ethylhexylphosphonic acid mono-2-ethylhexyl ester (HEH[EHP])
Source: Royal Society of Chemistry journal article supplement (doi:10.1039/d4dt00424h), 2024-01-01
Supplement: d4dt00424h1.pdf [file d4dt00424h1.pdf]

## Supplementary Information: Effect of *f*-element Complexation on the Radiolysis of 2-ethylhexylphosphonic acid mono-2-ethylhexyl ester (HEH[EHP])

Stephen P. Mezyk<sup>a,\*</sup>, Makayla Baxter<sup>b,c</sup>, Cristian Celis-Barros<sup>d</sup>, Travis S. Grimes<sup>c</sup>, Peter R. Zalupski<sup>c</sup>, Cathy Rae<sup>c</sup>, Christopher A. Zarzana<sup>c</sup>, Andrew R. Cook<sup>c</sup>, and Gregory P. Horne<sup>c,\*</sup>

<sup>a</sup> Department of Chemistry and Biochemistry, California State University Long Beach, 1250 Bellflower Boulevard, Long Beach California, 90840-9507, USA.

<sup>b</sup> Department of Chemistry, Northwestern University, Evanston, IL, 60208 USA.

<sup>c</sup> Center for Radiation Chemistry Research, Idaho National Laboratory, Idaho Falls, ID, P.O. Box 1625, 83415, USA.

<sup>d</sup> Department of Chemistry, Oak Ridge National Laboratory, West Lafayette, IN 47906, USA.

<sup>e</sup> Department of Chemistry, Brookhaven National Laboratory, Upton, New York, 11973, USA.

\*Corresponding authors. E-mail: [stephen.mezyk@csulb.edu](mailto:stephen.mezyk@csulb.edu) and [gregory.holmbeck@inl.gov](mailto:gregory.holmbeck@inl.gov).

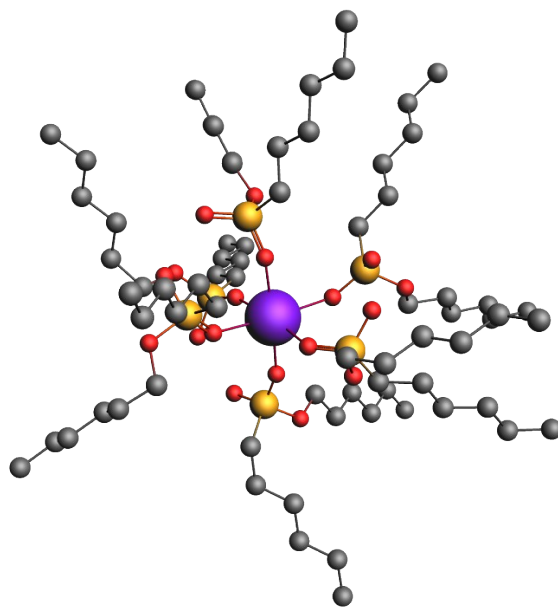

**Fig. S1.** Computational model structure used to evaluate the bonding properties of the *f*-element coordinated HEH[EHP] complexes.

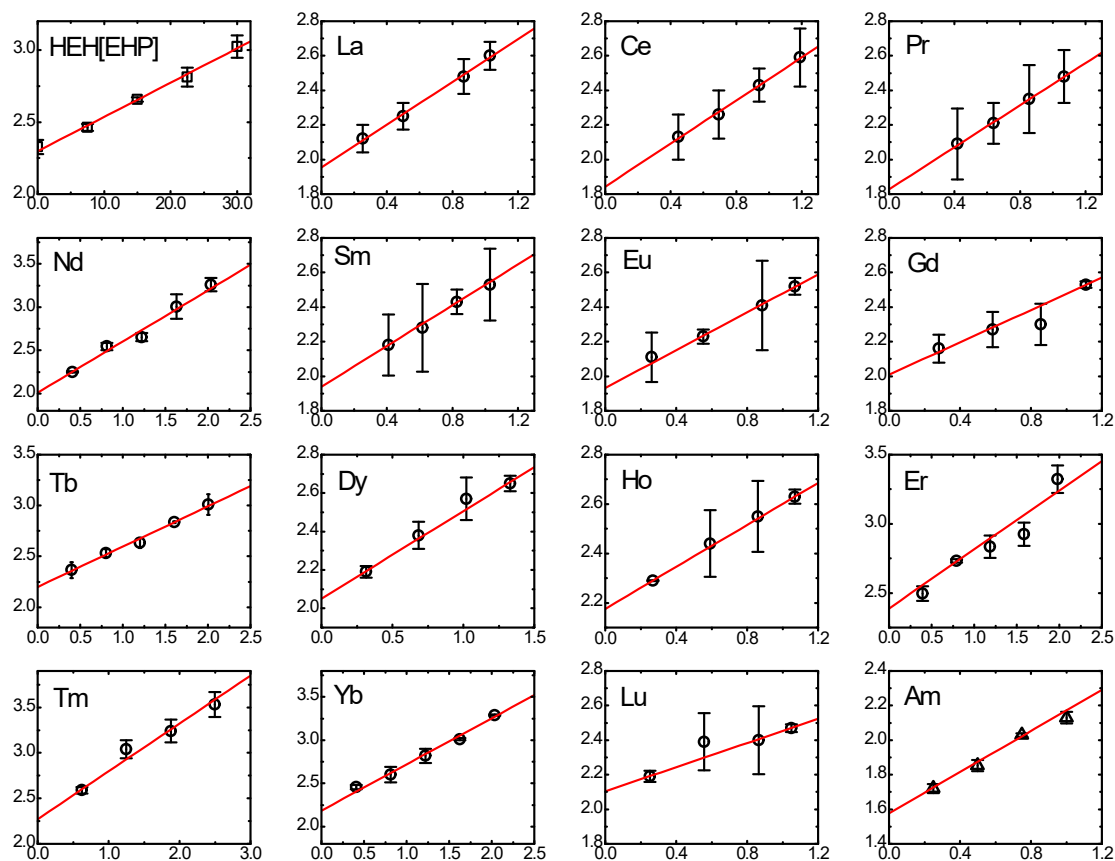

**Fig. S2.** Second-order rate coefficient determinations for non-complexed HEH[EHP], Ln-complexed HEH[EHP] (La–Lu), and americium complexed HEH[EHP]. For all plots: y-axes ( $10^{-8} \text{ s}^{-1}$ ), x-axes [Species] (mM). Slope values correspond to second-order rate coefficients as detailed in main text, **Table 1**.

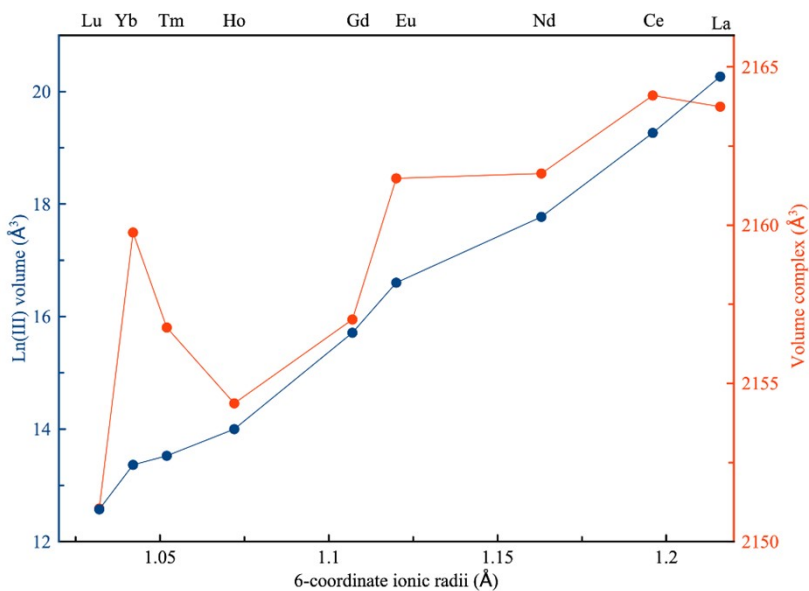

**Fig. S3.** Correlation between 6-coordinate ionic radii and calculated molecular (red) and Ln(III) (blue) volumes from the topological analysis.
